# Supplementary material for: Composition-controlled synthesis of Ni2−xCoxP nanocrystals as bifunctional catalysts for water splitting
Source: Royal Society of Chemistry journal article supplement (doi:10.1039/c6ra26691f), 2017-01-01
Supplement: c6ra26691f1.pdf [file c6ra26691f1.pdf]

Supporting Information

## Composition-Controlled Synthesis of Ni<sub>2-x</sub>CoxP Nanocrystals as Bifunctional Catalysts for Water Splitting

Qingshuang Liang, Keke Huang, Xiaofeng Wu, Xiyang Wang, Wei Ma, Shouhua Feng\*

State Key Laboratory of Inorganic Synthesis and Preparative Chemistry, College of Chemistry,  
Jilin University, Changchun 130012, P. R. China.

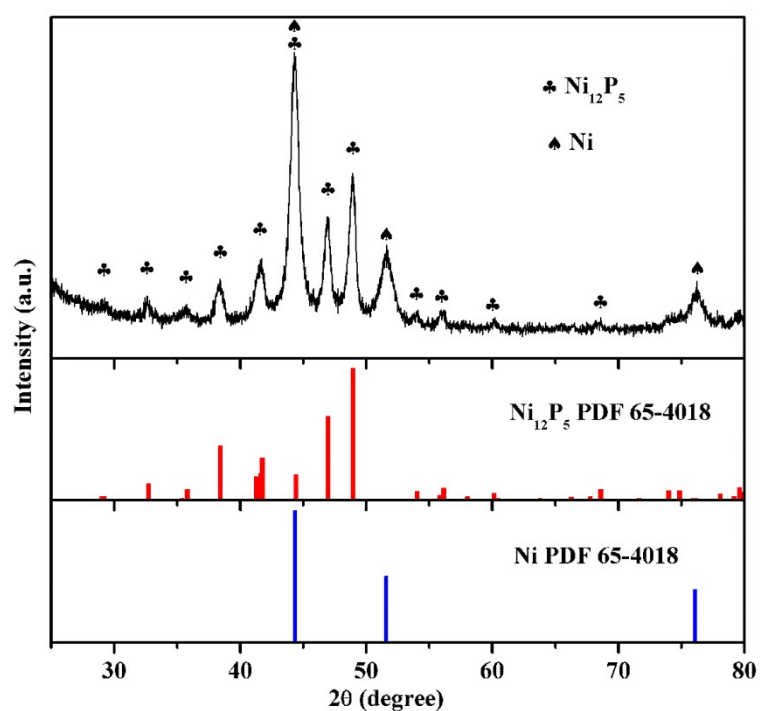

FigureS1. The XRD pattern of as-prepared nanoparticles obtained after the reaction at 250 °C for 2h without adding of NaBH<sub>4</sub>.

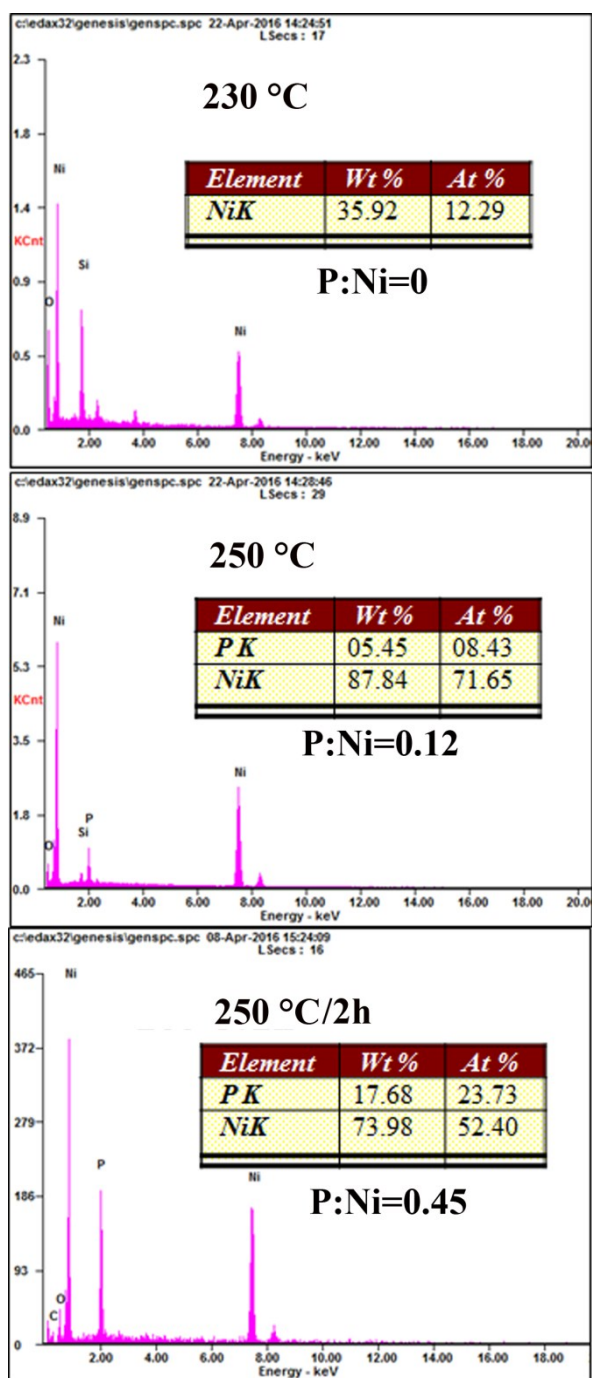

FigureS2. EDS results of nanoparticles isolated from the reaction at different temperatures without adding of  $\text{NaBH}_4$ .

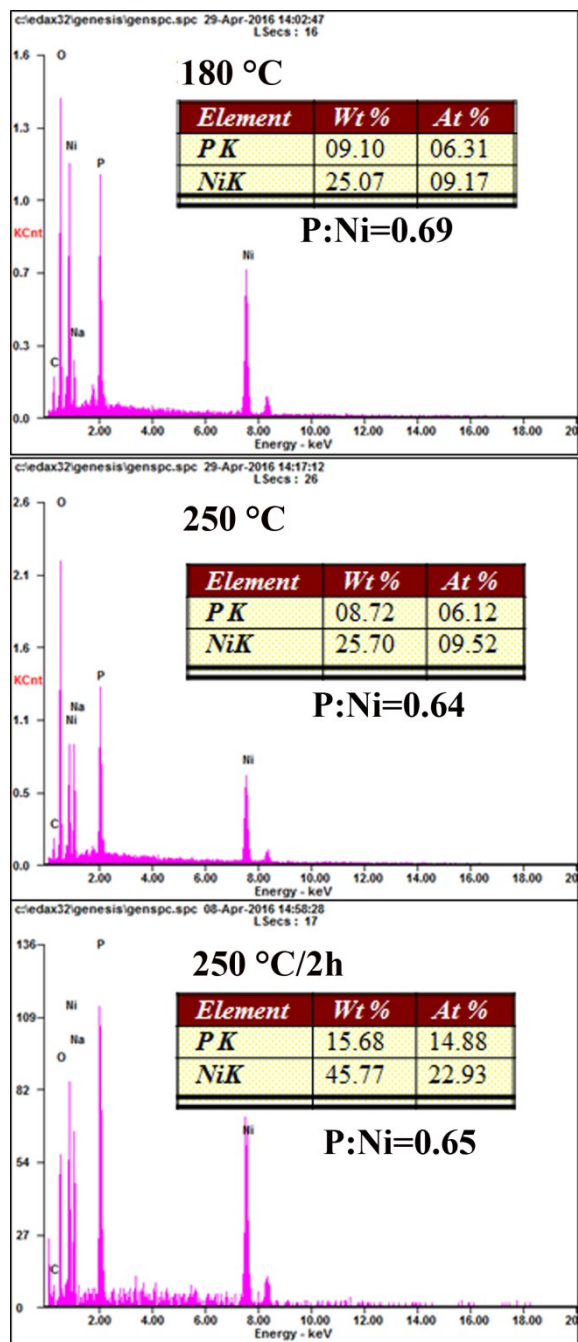

FigureS3. EDS results of nanoparticles isolated from the reaction at different temperatures with the adding of  $\text{NaBH}_4$ .

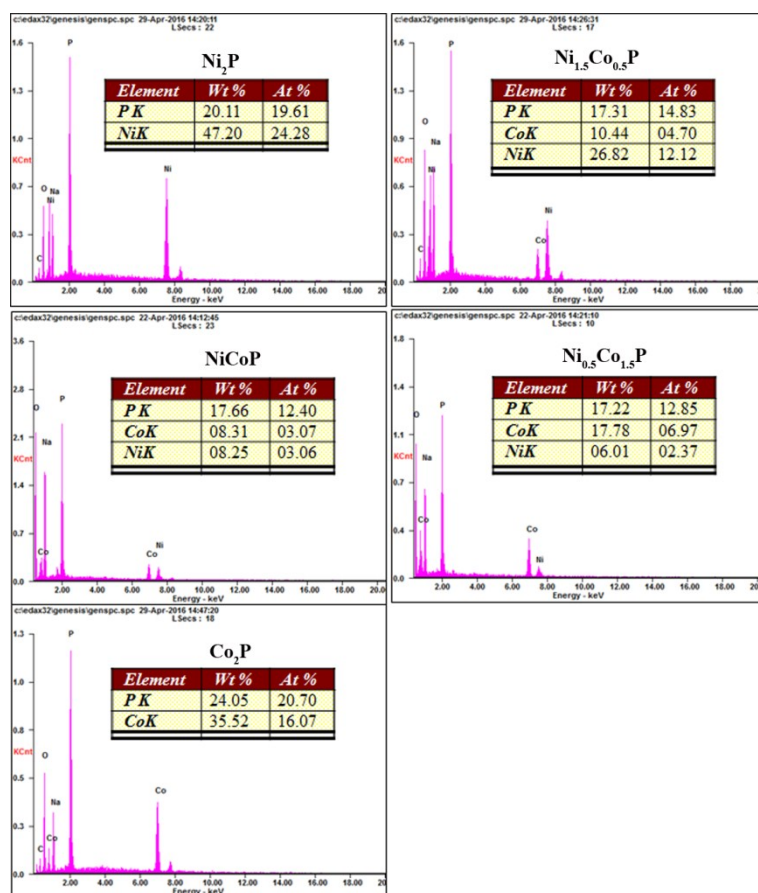

Figure S4 EDS spectra of as-prepared  $\text{Ni}_{2-x}\text{Co}_x\text{P}$  NCs with different compositions.

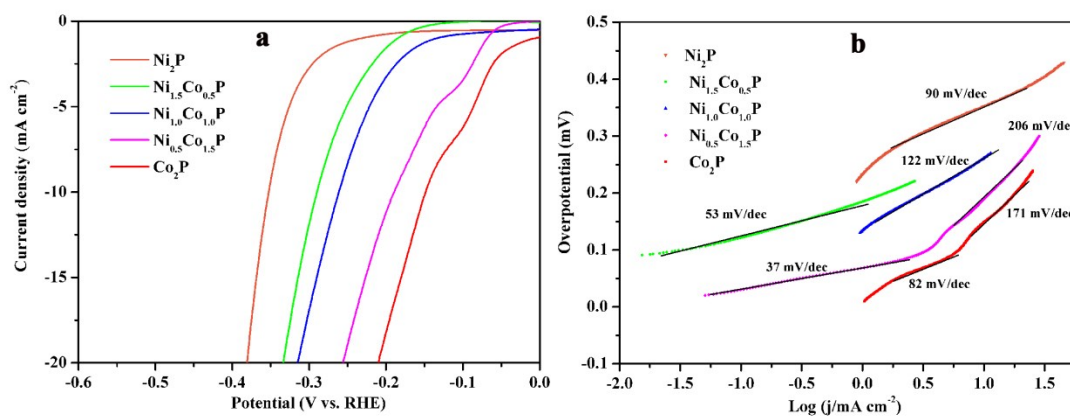

Figure S5. (a) The polarization curves of  $\text{Ni}_{2-x}\text{Co}_x\text{P}$  NCs with different Co/Ni ratios in 1.0 M KOH for HER. (b) Corresponding Tafel plots.

Table S1: Surface compositions for Ni<sub>2-x</sub>Co<sub>x</sub>P nanoparticle compositions as assessed from XPS data.

| Nominal Bulk Composition              | Surface Composition                     | Surface Co/Ni Mole Ratio | Surface P/(Ni+Co) Mole Ratio |
|---------------------------------------|-----------------------------------------|--------------------------|------------------------------|
| Ni <sub>2</sub> P                     | Ni <sub>0.27</sub> P                    | --                       | 3.7                          |
| Ni <sub>1.5</sub> Co <sub>0.5</sub> P | Ni <sub>0.23</sub> Co <sub>0.12</sub> P | 0.52                     | 2.9                          |
| NiCoP                                 | Ni <sub>0.17</sub> Co <sub>0.33</sub> P | 1.94                     | 2                            |
| Ni <sub>0.5</sub> Co <sub>1.5</sub> P | Ni <sub>0.05</sub> Co <sub>0.2</sub> P  | 4                        | 4                            |
| Co <sub>2</sub> P                     | Co <sub>0.3</sub> P                     | --                       | 3.3                          |
